# Supplementary material for: Nucleotide(s)-mediated simultaneous N, P co-doped reduced graphene oxide (N, P-rGO) porous nanohybrids as high-performance electrode materials for designing sustainable binder-free high-voltage (2.8 V) aqueous symmetric supercapacitors and electrochemical sensors
Source: Royal Society of Chemistry journal article supplement (doi:10.1039/d2se00666a), 2022-01-01
Supplement: d2se00666a1.pdf [file d2se00666a1.pdf]

**Nucleotide(s)-mediated simultaneous N, P co-doped reduced graphene oxide (N, P-rGO) porous nanohybrids as a high-performance electrode material for designing sustainable binder-free high-voltage (2.8 V) aqueous symmetric supercapacitor and electrochemical sensor**

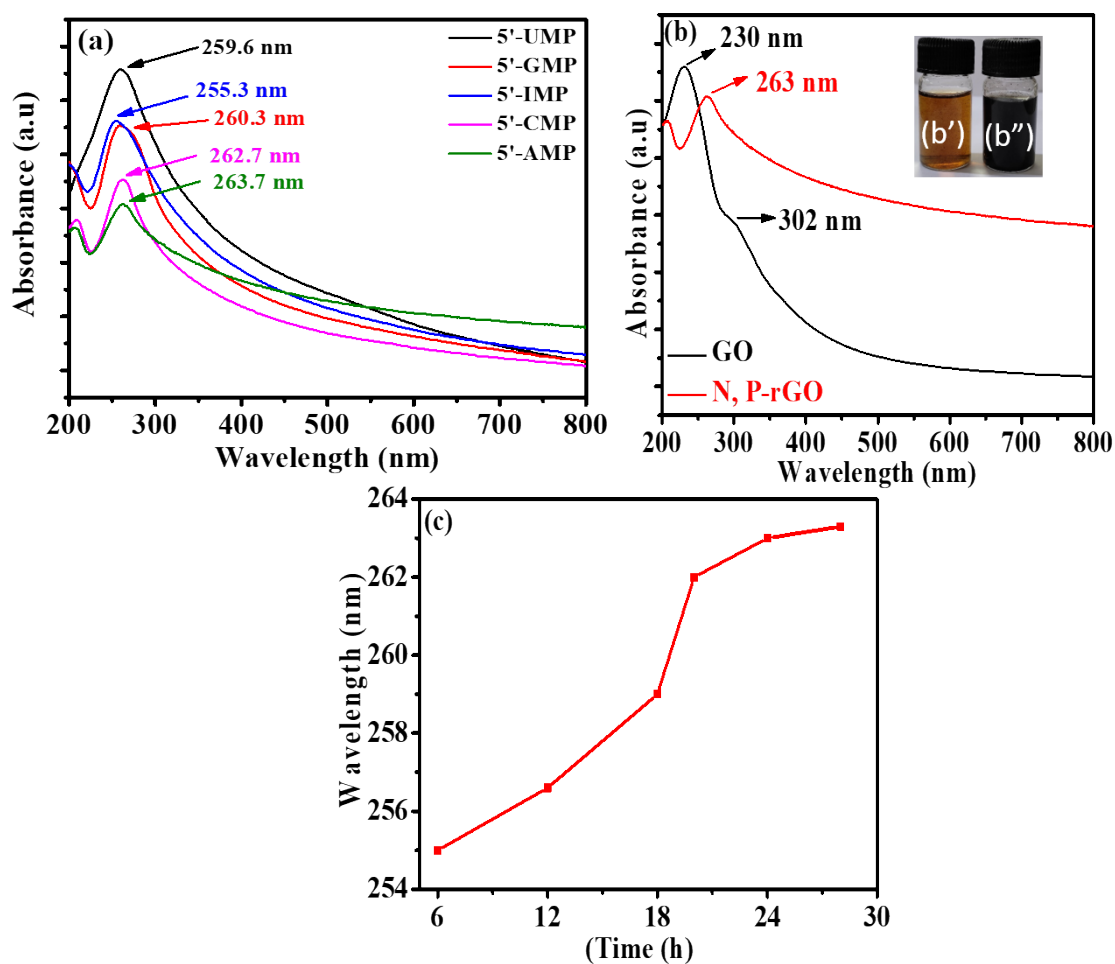

**Fig. S1.** Optical spectra of different nucleotide(s)-mediated reduction of GO (a); Optical spectra of GO and 5'-AMP-mediated-N, P-rGO (inset) digital photograph of GO (b') and N, P-rGO (b''); maximum absorption of N, P-rGO with time (c).

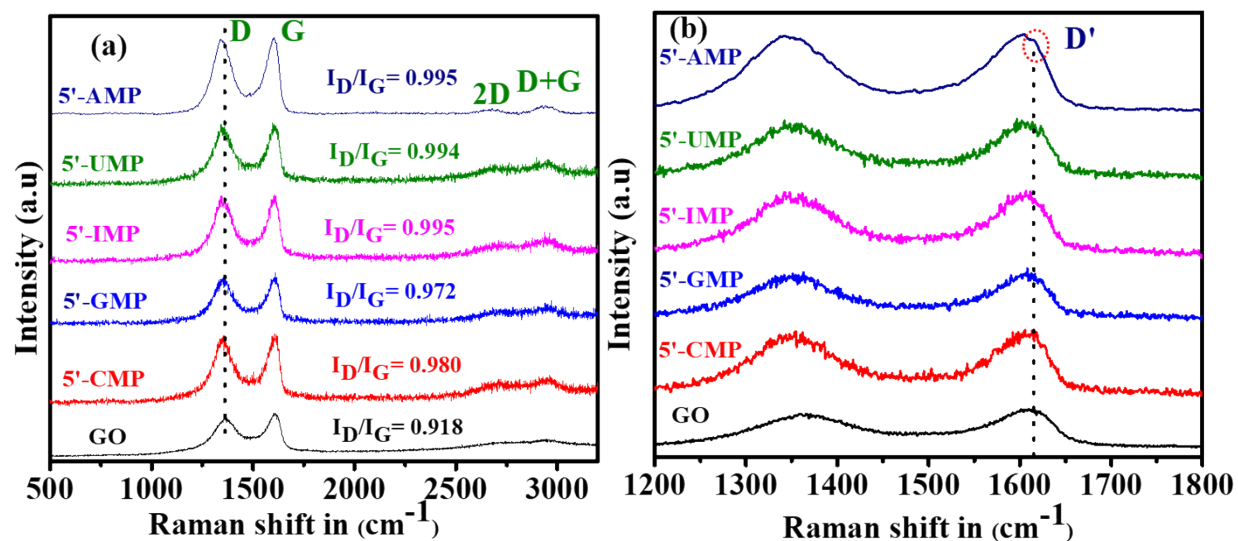

**Fig. S2.** Raman spectral comparison of different nucleotide(s) (5'-AMP, 5'-UMP, 5'-IMP, 5'-GMP and 5'-CMP)-mediated N, P- rGO in the wavenumber range of 500-3500 cm<sup>-1</sup>; Raman spectra of GO (a); Raman spectra of these samples extended in the wavenumber range of 1200-1800 cm<sup>-1</sup> (a').

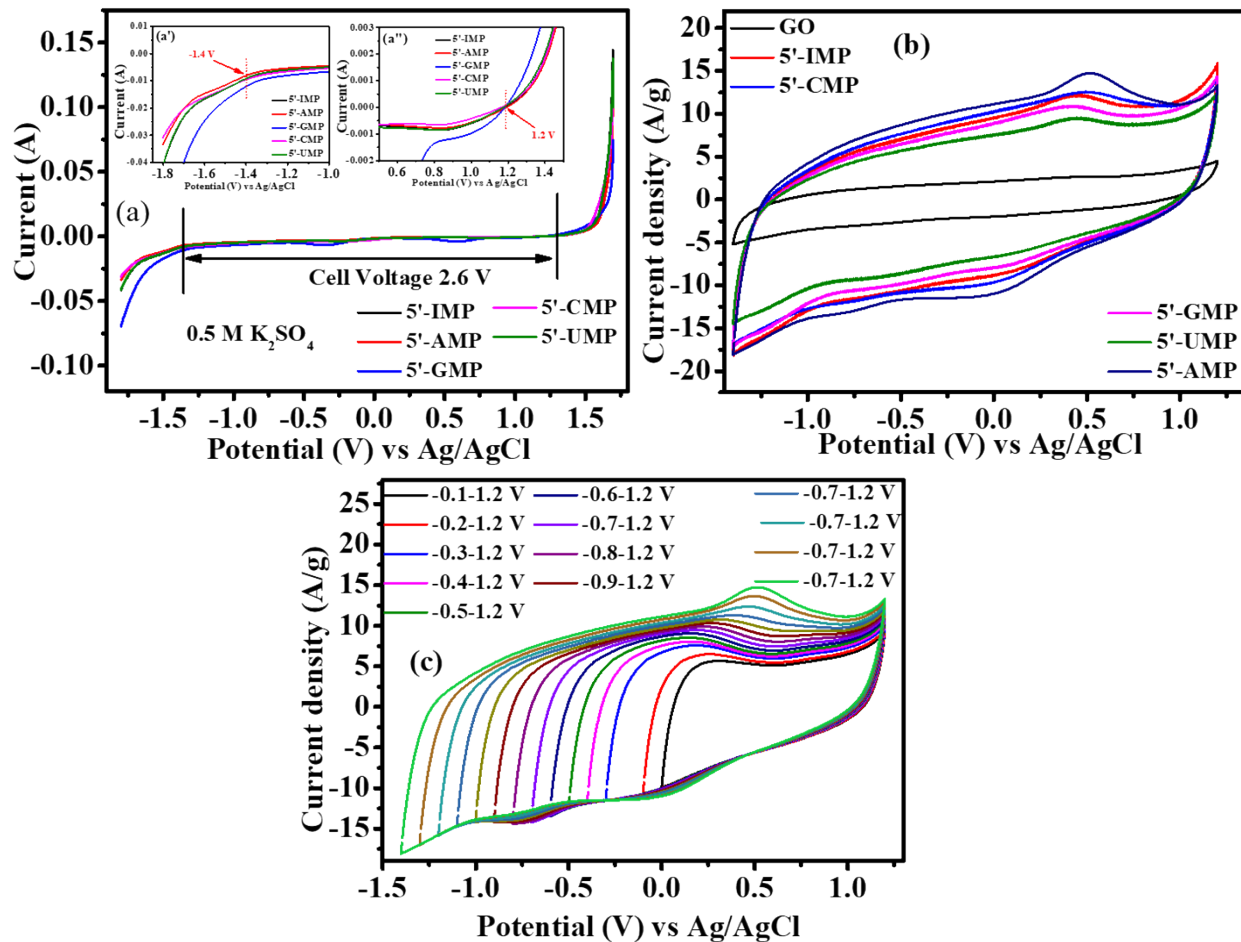

**Fig. S3.** Linear sweep voltammetry (LSV) of three electrode system for different nucleotide(s)-mediated N, P-rGO in 0.5 m  $K_2SO_4$  (a), extended LSV Voltammograms in different potential window of these samples - Inset (a') (a''). A comparison of CVs of different nucleotide(s) (5'-AMP, 5'-UMP, 5'-IMP, 5'-GMP and 5'-CMP)-mediated N, P-rGO in the potential range of -1.4 to 1.2 V with a GO (b); CV plots of 5'-AMP mediated N, P-rGO as a function of variation in cathodic potential ranging from: -1.4 to 0 V (c)

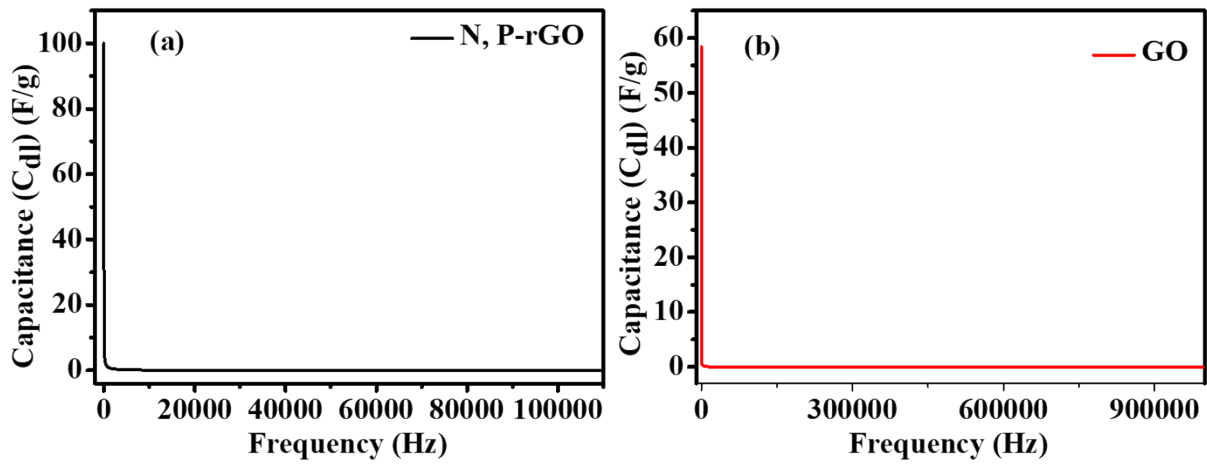

**Fig. S4.** Capacitance ( $C_{dl}$ ) vs Frequency curve at frequency range of 0.01 Hz to  $10^6$  Hz obtained using the Nyquist plot.

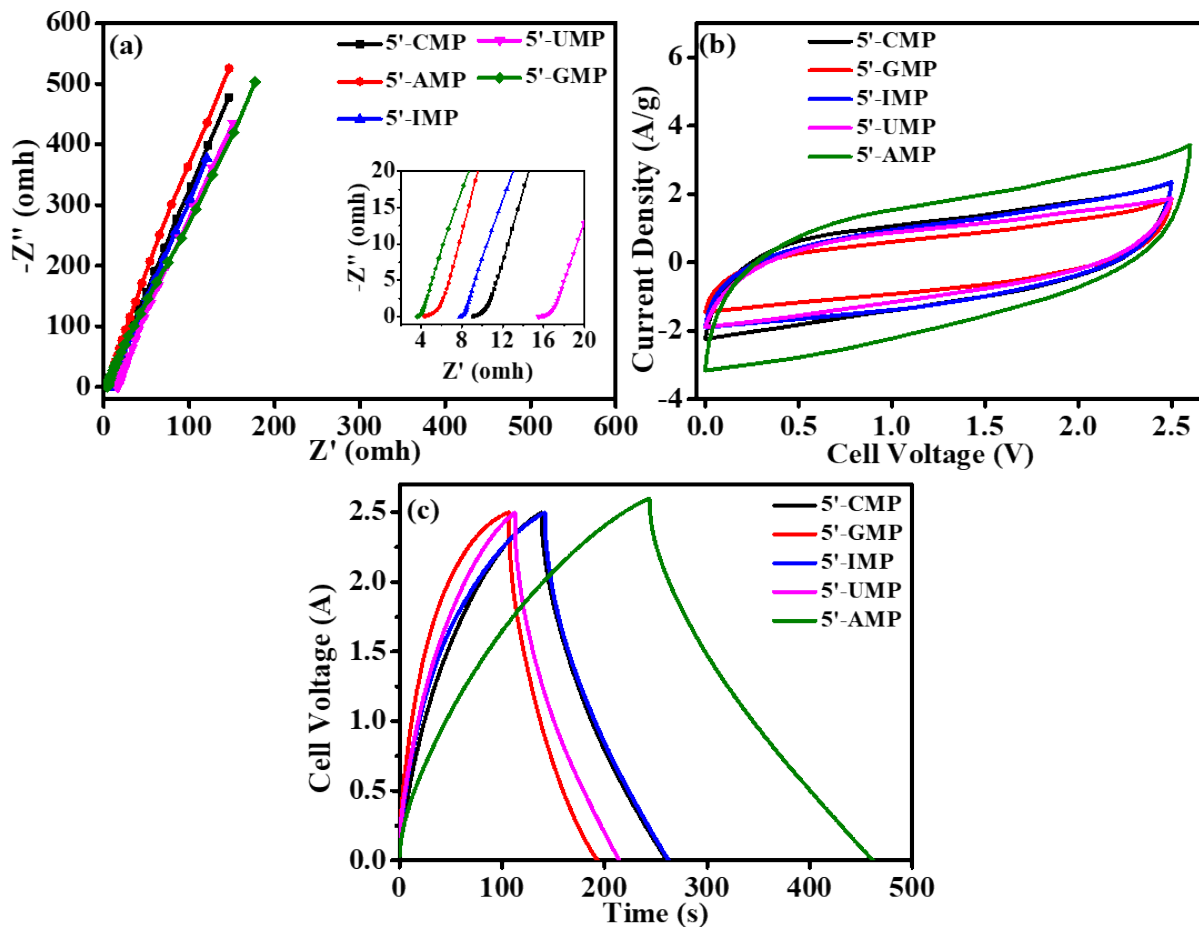

**Fig. S5.** Impedance curves, inset: extended curves between 0-3 Ohm (a); CV measurements for SSC constructed from nucleotides 5'-CMP/ 5'-AMP/ 5'-GMP/ 5'-UMP and 5'-IMP-mediated N, P-rGO in 0.5 m  $K_2SO_4$  (b). CV voltammograms recorded at 100 mV/s scan rate GCD curves at 1 A/g current density (c).

**Table S1.** Electrochemical data for SSC, constructed from nucleotides 5'-CMP/5'-AMP/ 5'-GMP/ 5'-UMP/ 5'-IMP-mediated N, P-rGO, recorded using 0.5 m K<sub>2</sub>SO<sub>4</sub> as an electrolyte.

| <b>S. No.</b> | <b>Nucleotide</b> | <b>Electrolyte</b>                   | <b>Cell Voltage (V)</b> | <b>Capacitance (F g<sup>-1</sup>)</b> | <b>Energy density (Wh kg<sup>-1</sup>)</b> | <b>Power density (W kg<sup>-1</sup>)</b> | <b>Coulombic efficiency</b> |
|---------------|-------------------|--------------------------------------|-------------------------|---------------------------------------|--------------------------------------------|------------------------------------------|-----------------------------|
| 1             | 5'-GMP            | 0.5 m K <sub>2</sub> SO <sub>4</sub> | 2.5                     | 17.4                                  | 15.1                                       | 624.8                                    | 81.0                        |
| 2             | 5'-CMP            | 0.5 m K <sub>2</sub> SO <sub>4</sub> | 2.5                     | 24.5                                  | 24.2                                       | 624.8                                    | 88.4                        |
| 3             | 5'-AMP            | 0.5 m K <sub>2</sub> SO <sub>4</sub> | 2.6                     | 36.0                                  | 33.9                                       | 644.9                                    | 90.0                        |
| 4             | 5'-UMP            | 0.5 m K <sub>2</sub> SO <sub>4</sub> | 2.5                     | 20.3                                  | 17.6                                       | 624.8                                    | 90.3                        |
| 5             | 5'-IMP            | 0.5 m K <sub>2</sub> SO <sub>4</sub> | 2.5                     | 24.2                                  | 21.0                                       | 624.8                                    | 85.4                        |

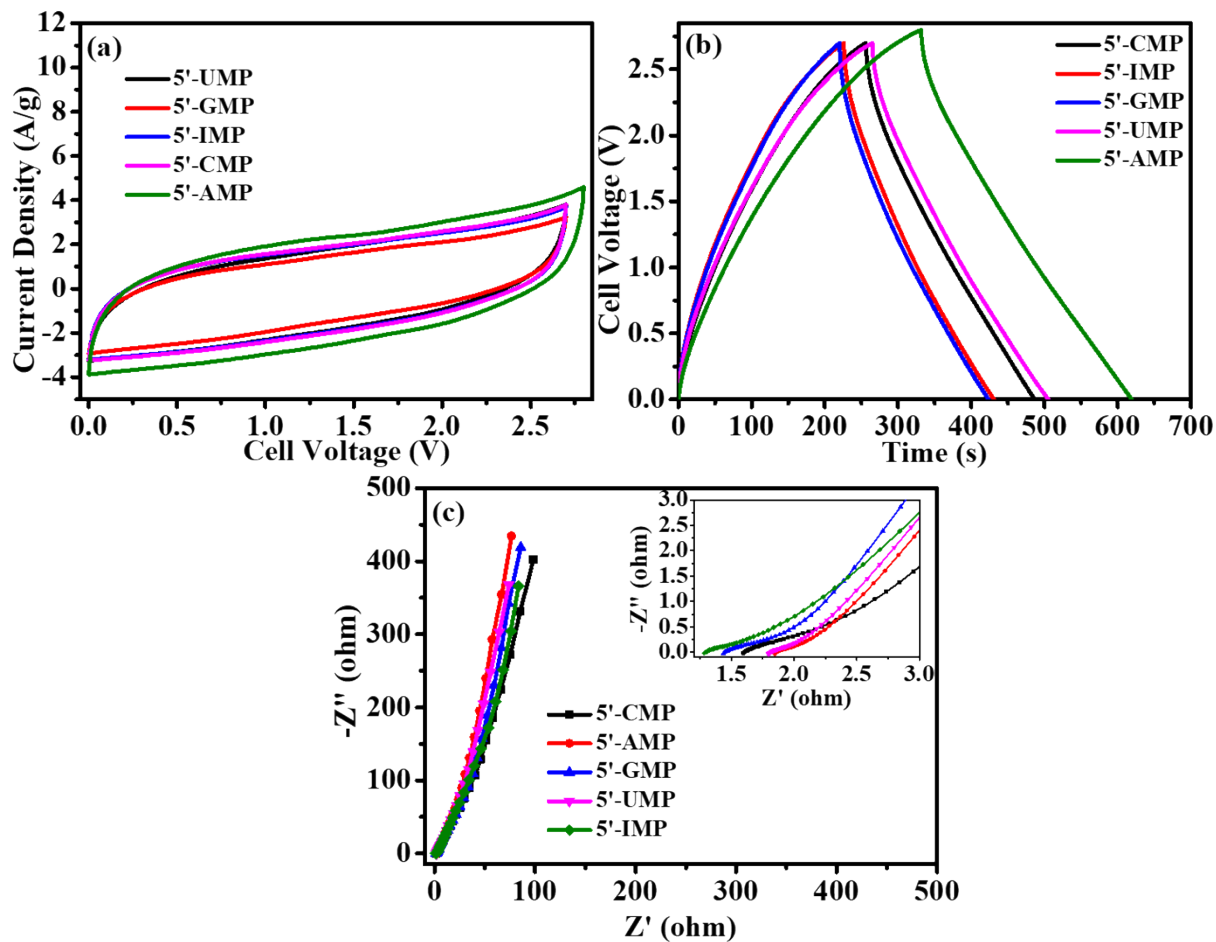

**Fig. S6.** CV measurements for SSC constructed from nucleotides 5'-CMP/ 5'-AMP/ 5'-GMP/ 5'-UMP/ 5'-IMP-mediated N, P-rGO in 17 m NaClO<sub>4</sub>: CV voltammograms recorded at 100 mV/s scan rate (a); GCD curves at 1 A/g current density (b). Impedance curves, inset: extended curves between 0-3 Ohm (c).

**Table S2.** Electrochemical data for SSC, constructed from nucleotides 5'-CMP/ 5'-AMP 5'-GMP/ 5'-UMP/ 5'-IMP-mediated N, P-rGO, recorded using 17 m NaClO<sub>4</sub> as an electrolyte.



| <b>S. No.</b> | <b>Nucleotides</b> | <b>Electrolyte</b>         | <b>Cell Voltage (V)</b> | <b>Capacitance (F g<sup>-1</sup>)</b> | <b>Energy Density (W h kg<sup>-1</sup>)</b> | <b>Power Density (W kg<sup>-1</sup>)</b> | <b>Coulombic efficiency</b> |
|---------------|--------------------|----------------------------|-------------------------|---------------------------------------|---------------------------------------------|------------------------------------------|-----------------------------|
| 1             | 5'-GMP             | 17 m<br>NaClO <sub>4</sub> | 2.7                     | 37.64                                 | 38.11                                       | 674.58                                   | 92.4                        |
| 2             | 5'-CMP             | 17 m<br>NaClO <sub>4</sub> | 2.7                     | 42.70                                 | 43.23                                       | 674.56                                   | 90.2                        |
| 3             | 5'-AMP             | 17 m<br>NaClO <sub>4</sub> | 2.8                     | 51.35                                 | 55.92                                       | 699.67                                   | 87.0                        |
| 4             | 5'-UMP             | 17 m<br>NaClO <sub>4</sub> | 2.7                     | 44.44                                 | 44.99                                       | 674.58                                   | 90.6                        |
| 5             | 5'-IMP             | 17 m<br>NaClO <sub>4</sub> | 2.7                     | 37.96                                 | 38.43                                       | 674.53                                   | 90.8                        |

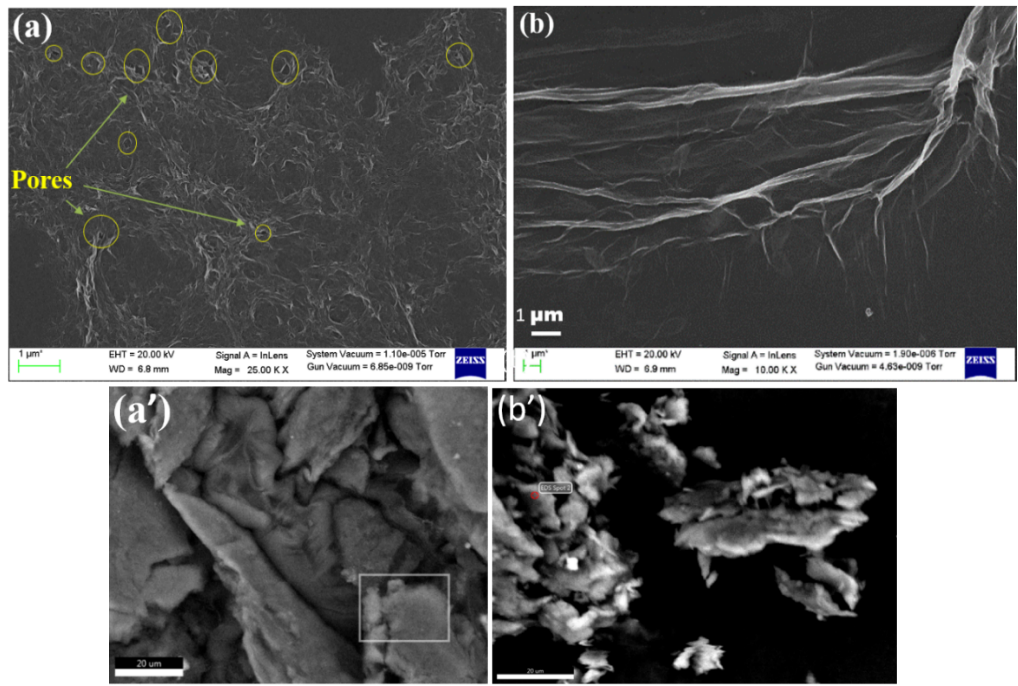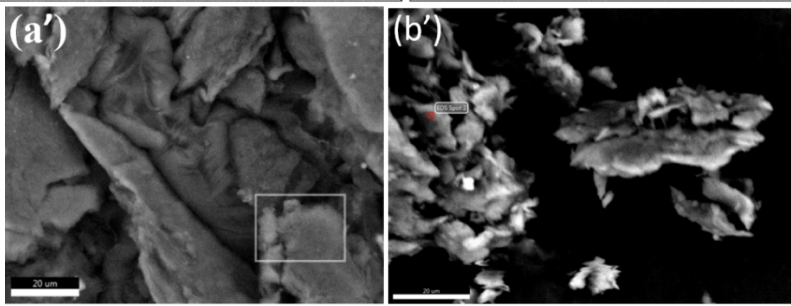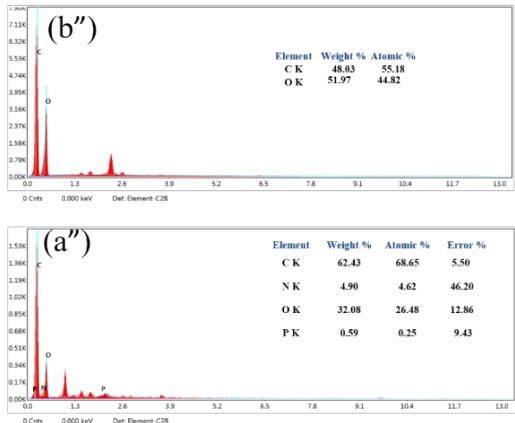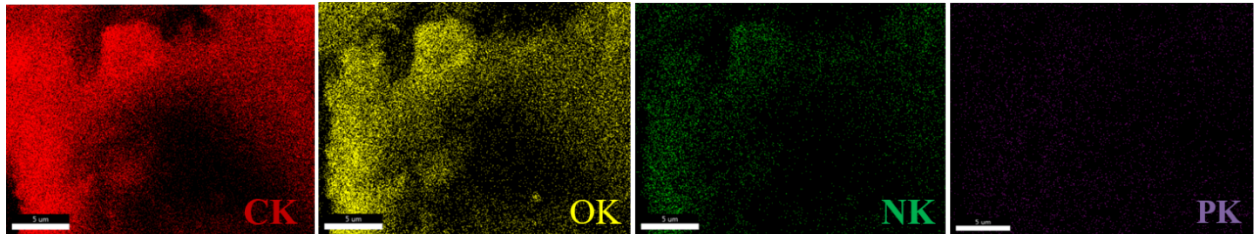

**Fig. S7.** SEM images of solid sample N, P-rGO (a) and GO (b), EDAX analysis and elemental composition of N, P-rGO (a') and GO (b''), respectively; elemental mapping of N, P-rGO.

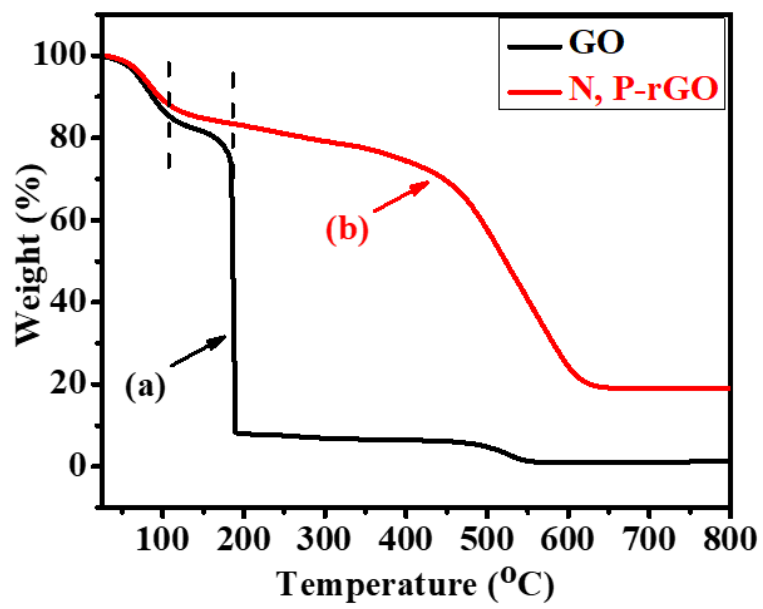

Fig. S8. Thermogravimetric analysis of GO (a) and N, P-rGO (b).

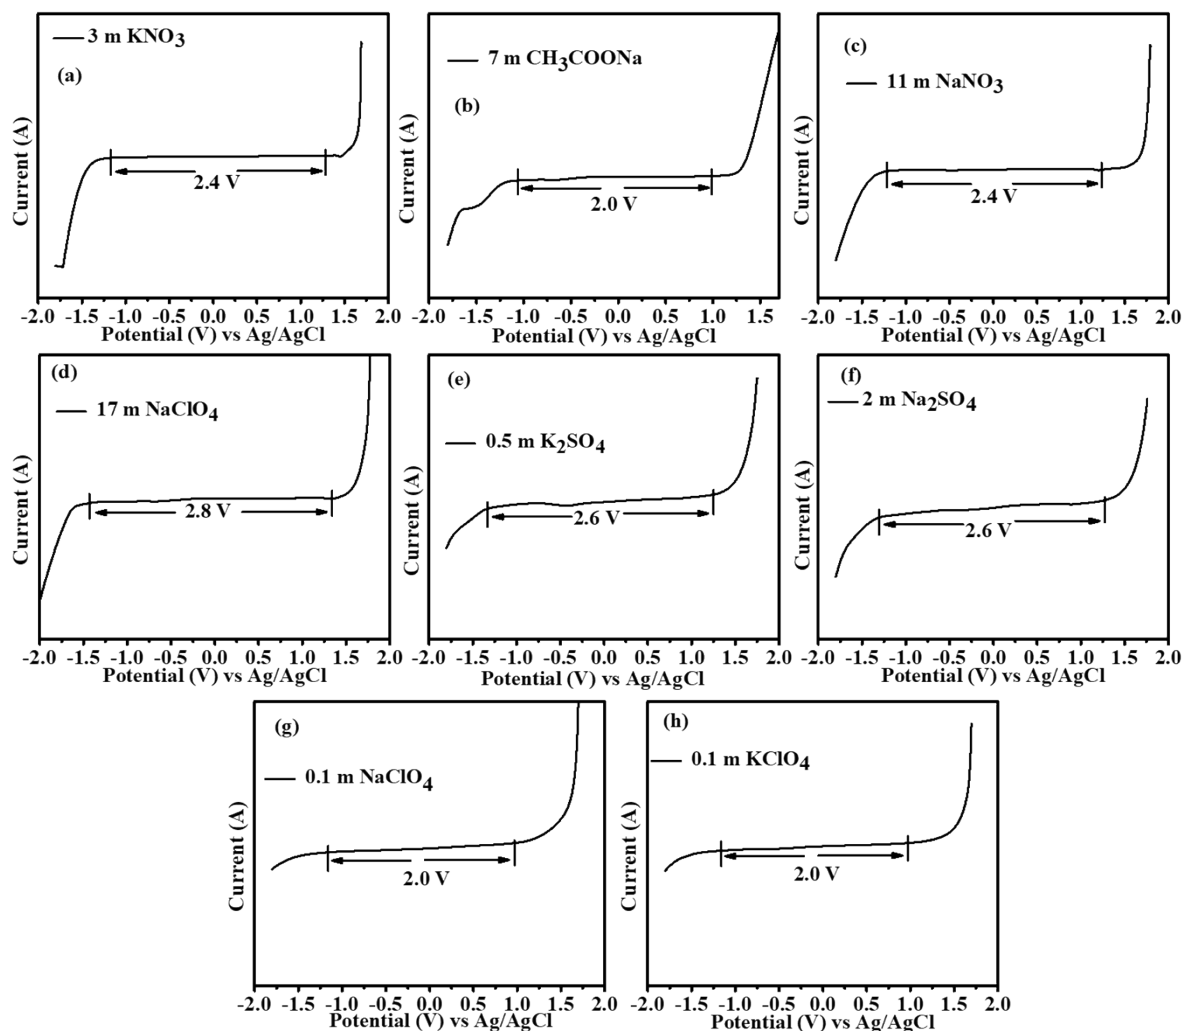

**Fig. S9.** Linear sweep voltammetry (LSV) measurements for estimating electrode potential window of N, P-rGO in different electrolytes performed at a scanning speed of 10 mV/ s using three-electrode set-up.

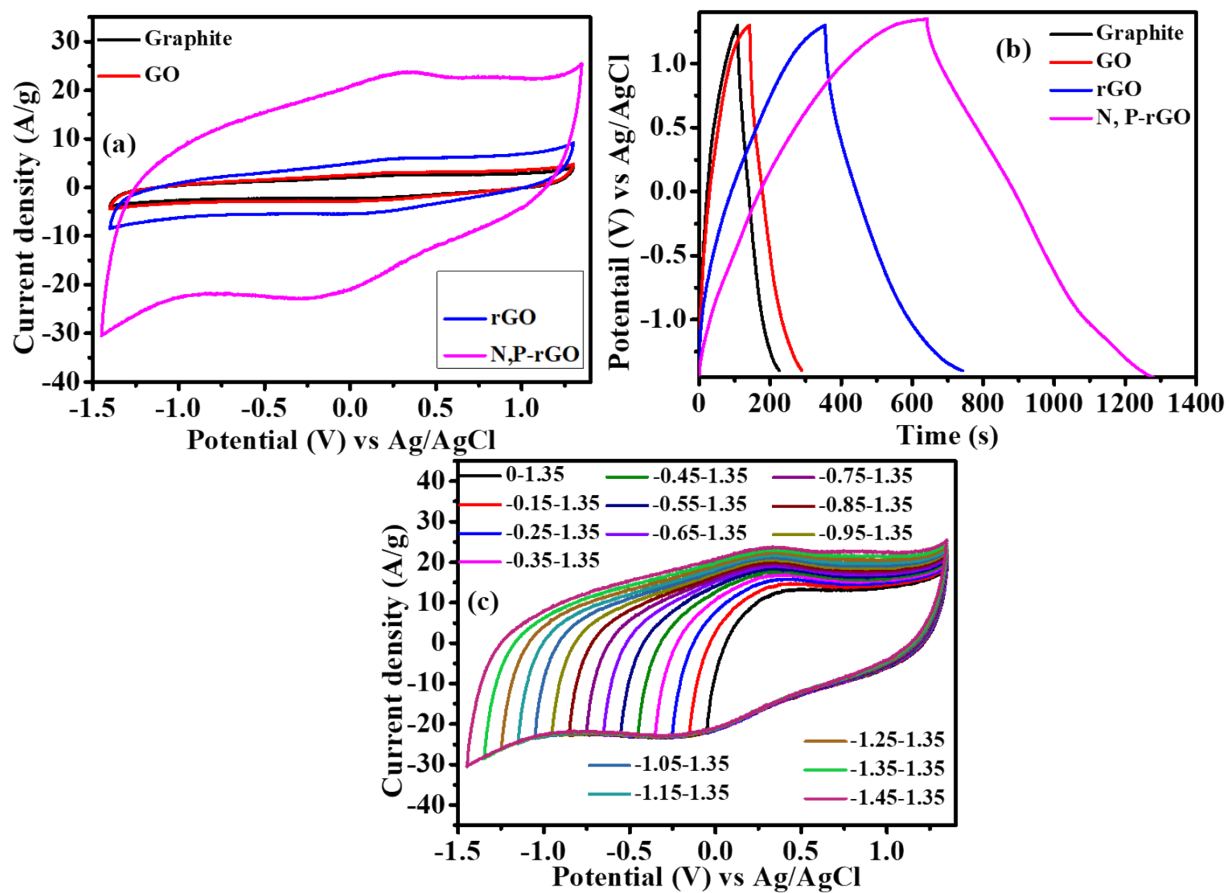

**Fig. S10.** Cyclic voltammograms recorded for bare graphite, GO, rGO and N, P-rGO (a) and their GCD at 1 A/g (b) with their  $C_s$  values ( $F g^{-1}$ ) calculated to be: 43.8, 54.7, 144.1 and 227.5 respectively. Cyclic voltammograms recorded by varying reduction potential from 0 to -1.5 V in 17 m NaClO<sub>4</sub> (c).

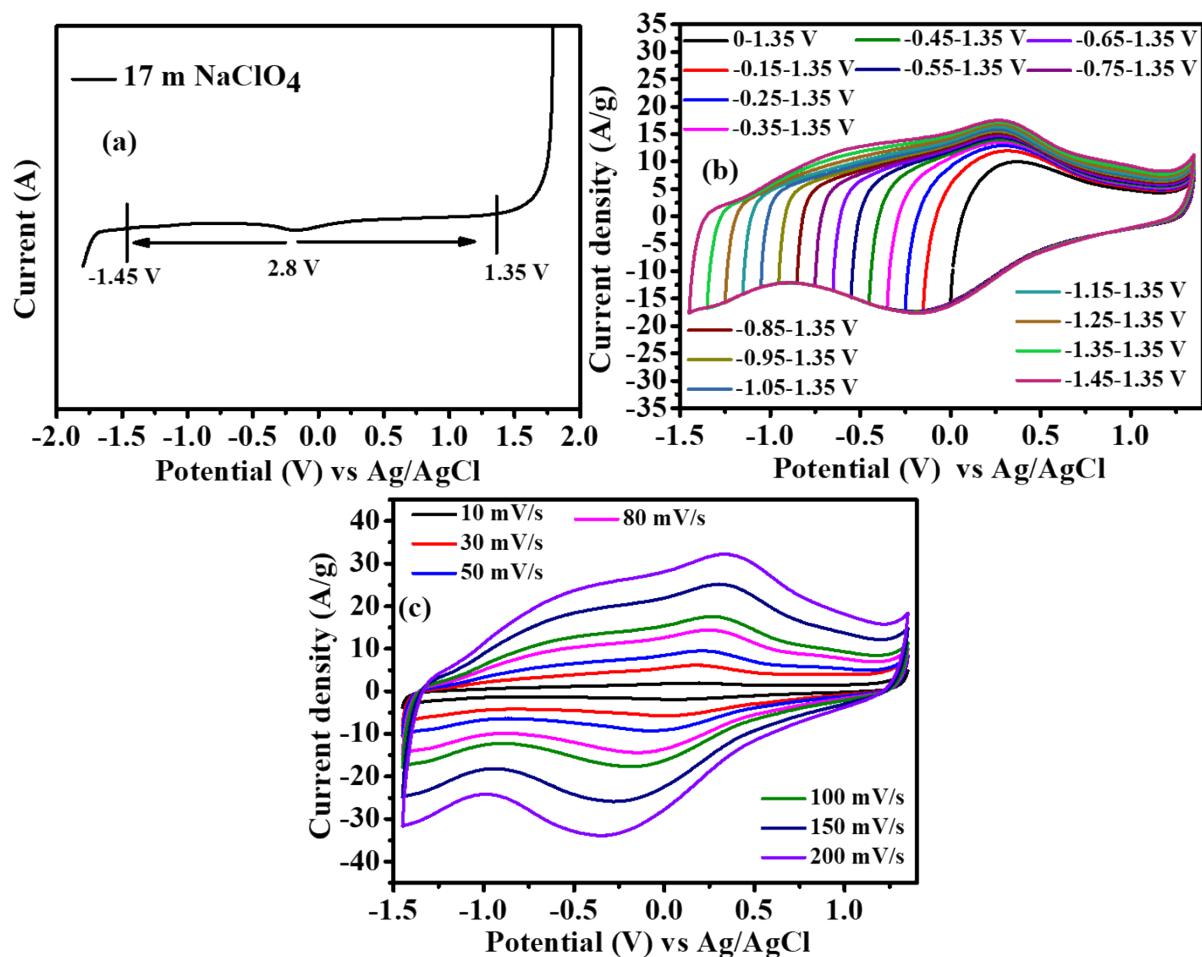

**Fig. S11.** Linear sweep voltammetry (LSV) of three-electrode system were recorded at a scan rate of 10 mV/ s in the used electrolytes 17 m NaClO<sub>4</sub> on a GCE as working electrode (a). Cyclic voltammograms recorded by varying reduction potential from 0 to -1.45 V in 17 m NaClO<sub>4</sub> (b) and CV recorded varied scan rate 10 mV/s to 200 mV/s (c).

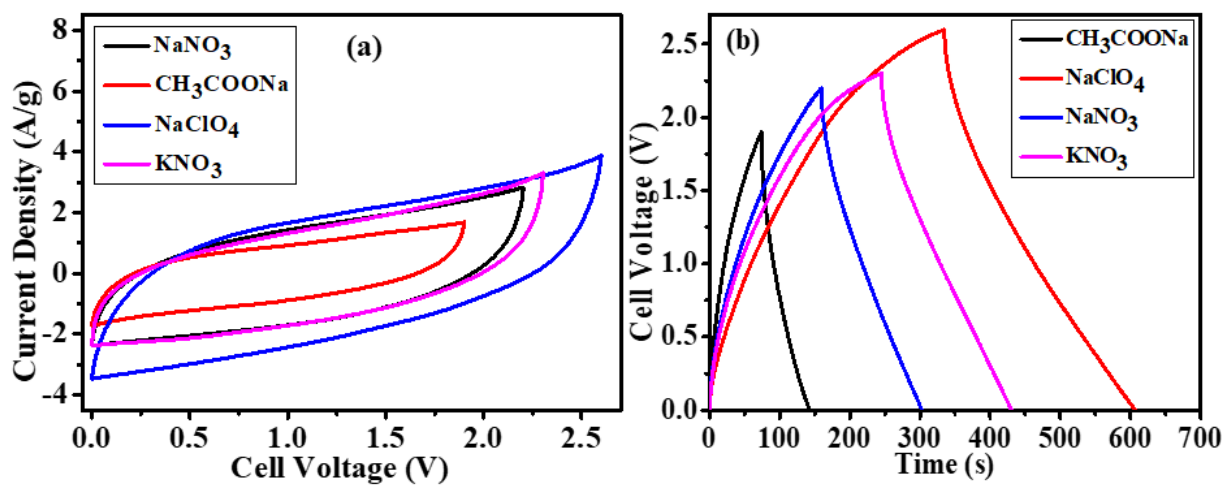

**Fig. S12.** Cyclic voltammetry measurements performed using SSC, designed from 5'-AMP mediated- N, P-rGO as an electrode material: recorded in 3 m each KNO<sub>3</sub>, CH<sub>3</sub>COONa, NaNO<sub>3</sub>, NaClO<sub>4</sub> electrolytes at 100 mV/s scan rate (a); GCD curves recorded at 1 A/g current density in these electrolytes (b).

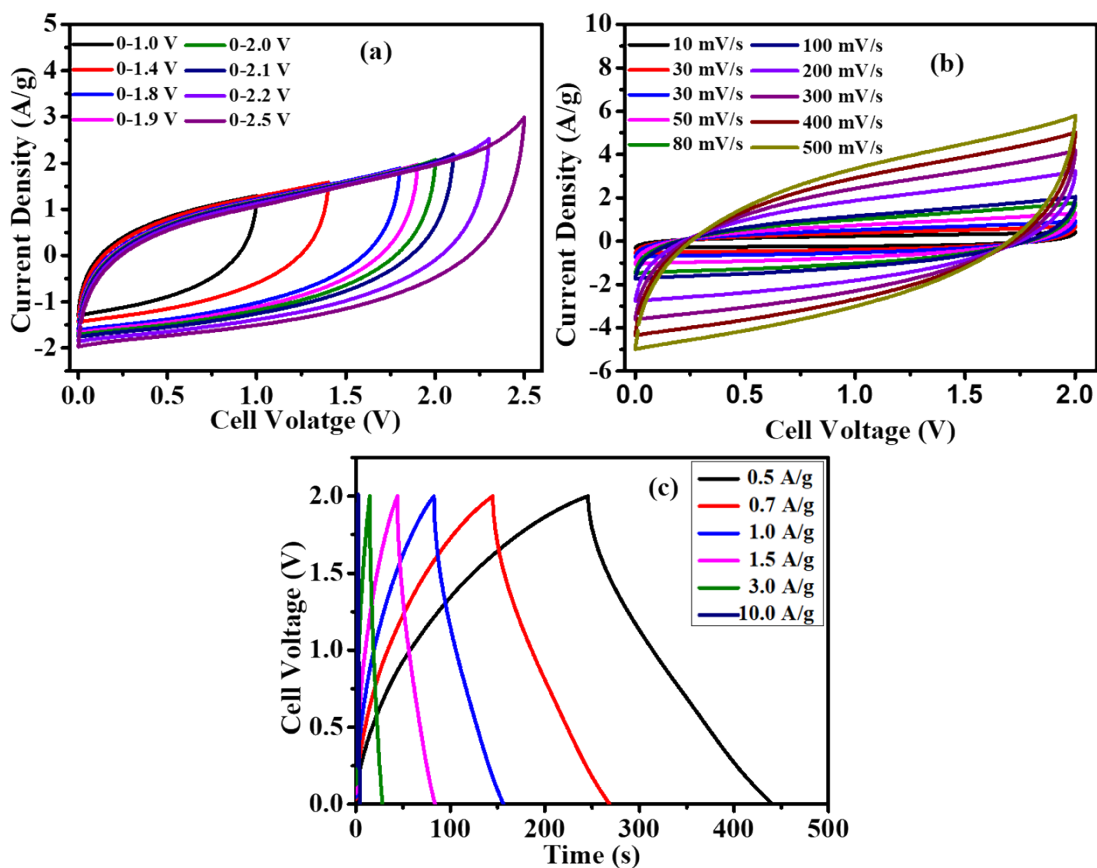

**Fig. S13.** Cyclic voltammetry measurements performed using SSC, designed from N, P-rGO as an electrode material in 7 m CH<sub>3</sub>COONa electrolyte: in varied range of cell voltages (1-2.5 V) at a scan speed of 100 mV/s (a), at different scan rates from 10-500 mV/s for cell voltage of 2.0 V (b); GCD curves recorded at different current density from 0.7 -10 A/g (c).



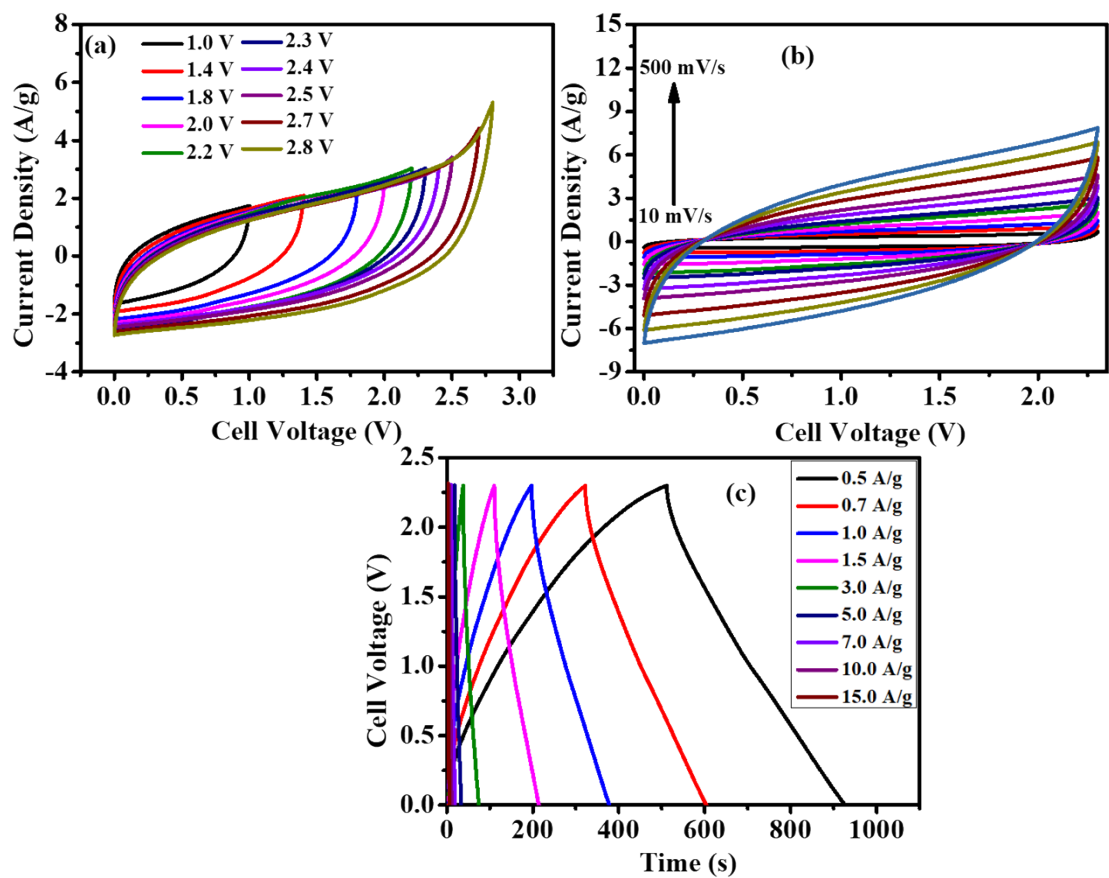

**Fig. S14.** CV measurements made for the SSC (using N, P-rGO as an electrode material) in the 11m NaNO<sub>3</sub> electrolyte: for a varied range of cell voltages (1-2.8 V) at a scan speed of 100 mV/s (a), at different scan rates from 10-500 mV/s (b); GCD for 2.3 V at different current density from 0.7 -15 A/g (c).

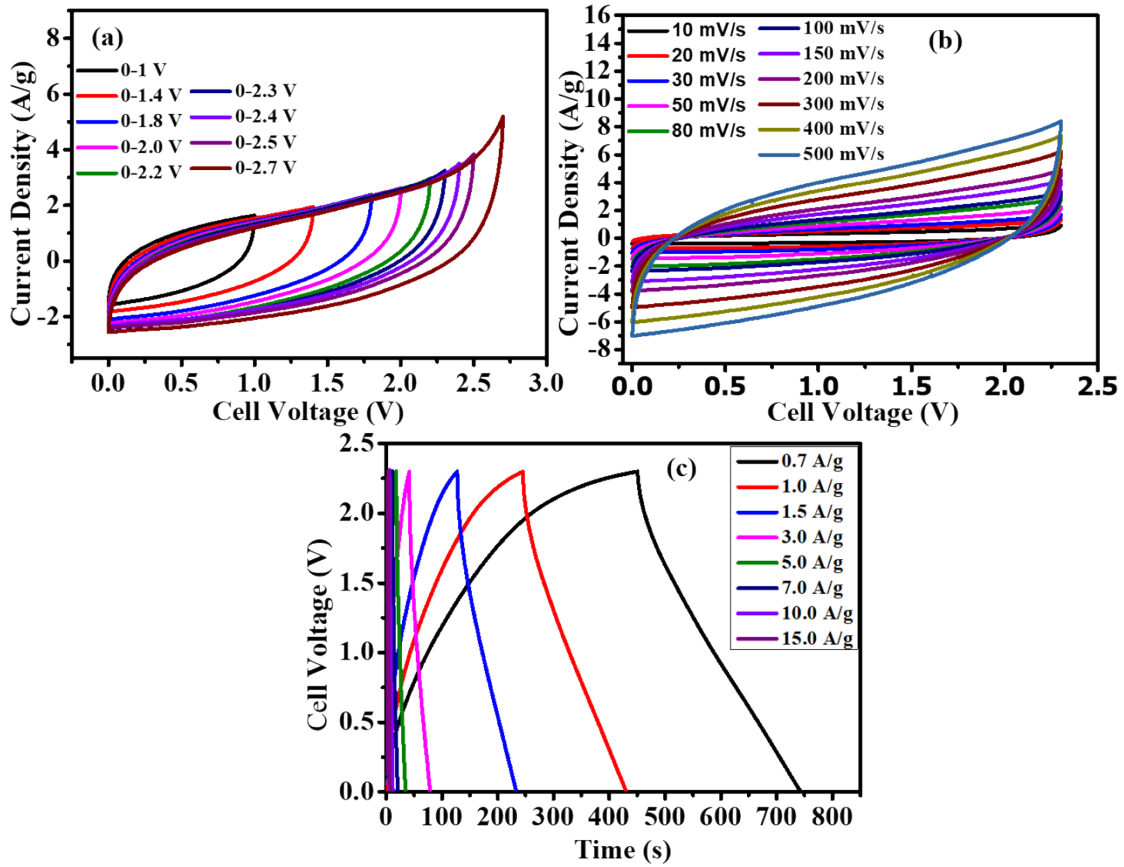

**Fig. S15.** CV measurements made for the SSC (using N, P-rGO as an electrode material) in the 3 m KNO<sub>3</sub> electrolyte: for a varied range of cell voltages (1-2.7 V) at a scan speed of 100 mV/s (a), at different scan rates from 10-500 mV/s (b); GCD for 2.3 V at different current density from 0.7 -15 A/g (c).

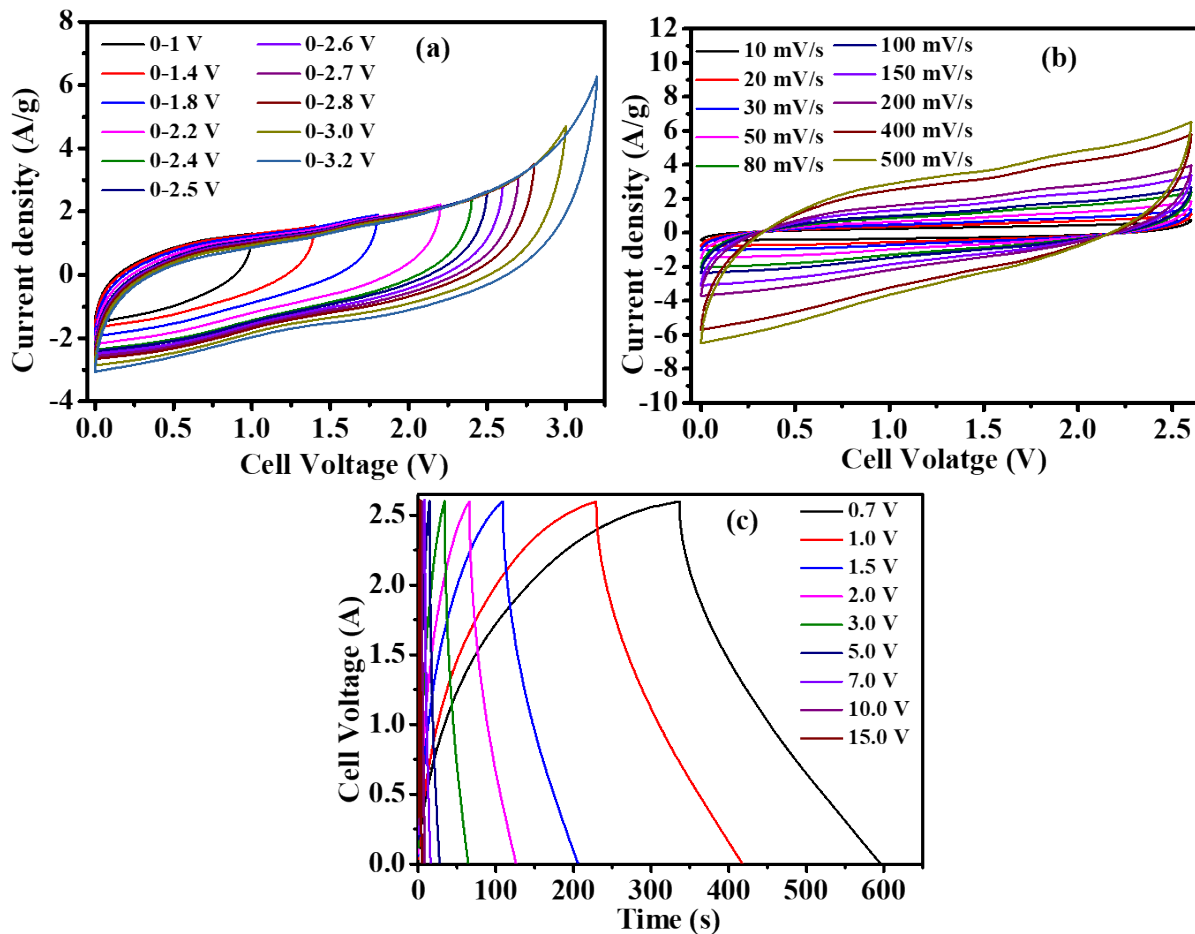

**Fig. S16.** CV measurements made for the SSC (using N, P-rGO as an electrode material) in the 0.5 m  $K_2SO_4$  electrolyte: for a varied range of cell voltages (1-3.2 V) at a scan speed of 100 mV/s (a), at different scan rates from 10-500 mV/s (b); GCD for 2.6 V at different current density from 0.7 -15 A/g (c).

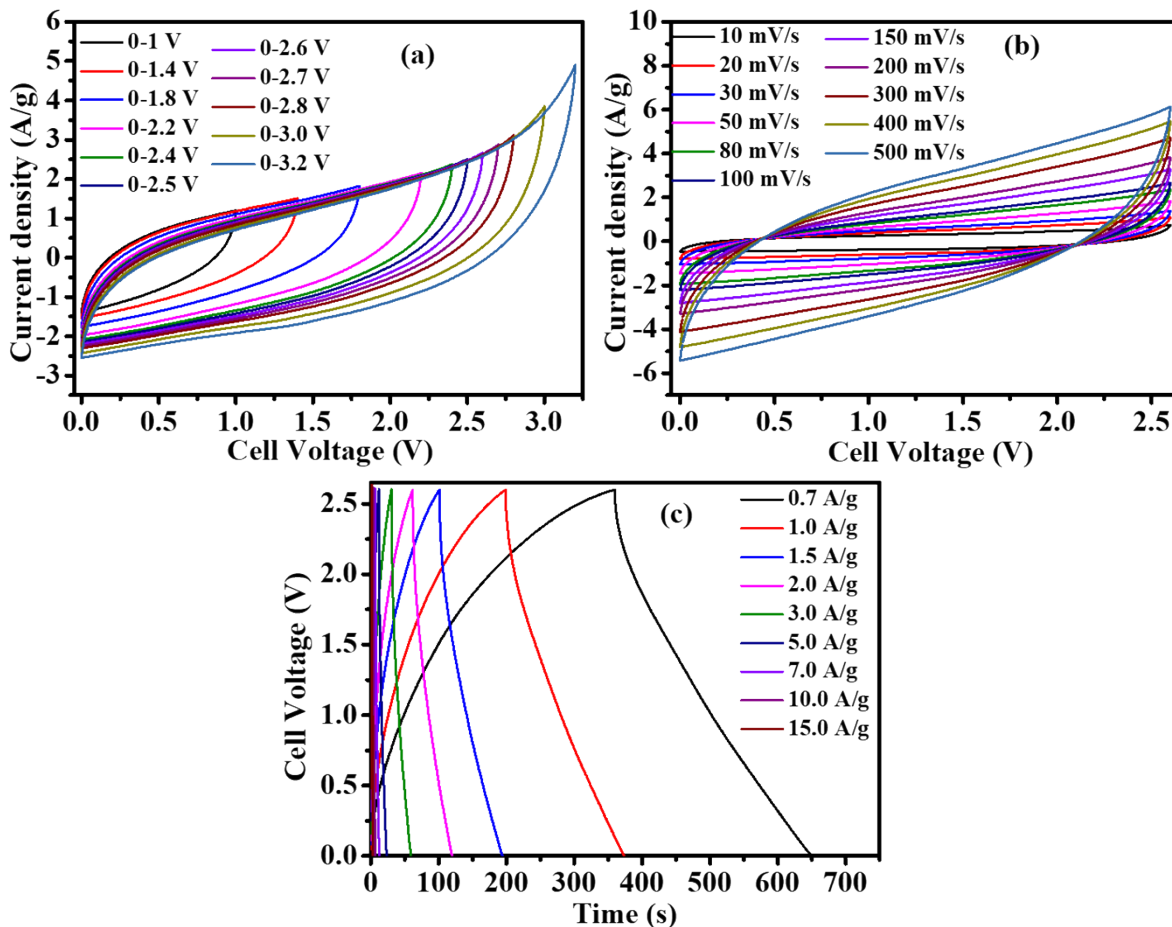

**Fig. S17.** CV measurements made for the SSC (using N, P-rGO as an electrode material) in the 2 m Na<sub>2</sub>SO<sub>4</sub> electrolyte: for a varied range of cell voltages (1-3.2 V) at a scan speed of 100 mV/s (a), at different scan rates from 10-500 mV/s (b); GCD for 2.6 V at different current density from 0.7 -15 A/g (c).

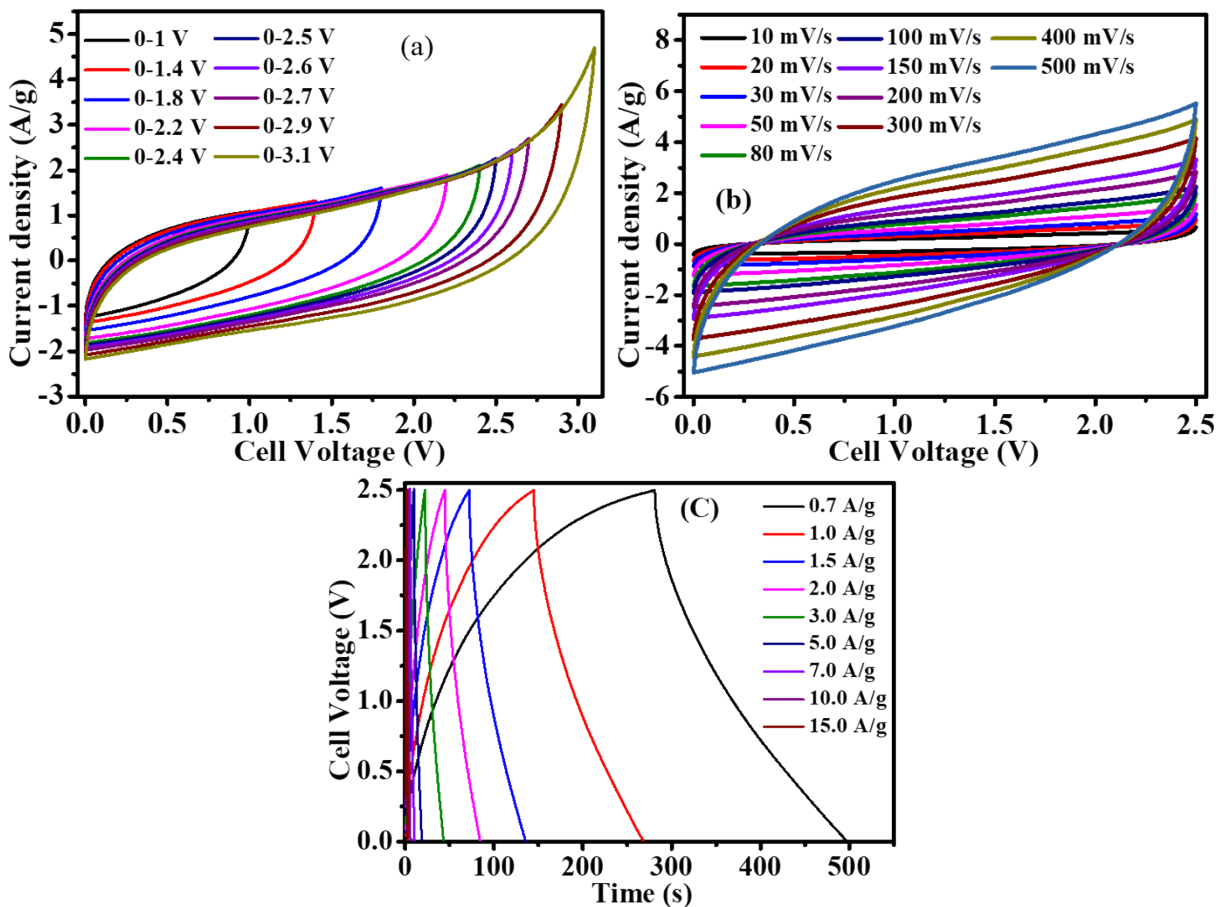

**Fig. S18.** CV measurements made for the SSC (using N, P-rGO as an electrode material) in the 0.5 m Na<sub>2</sub>SO<sub>4</sub> electrolyte: for a varied range of cell voltages (1-3.1 V) at a scan speed of 100 mV/s (a), at different scan rates from 10-500 mV/s (b); GCD for 2.5 V at different current density from 0.7 -15 A/g (c).

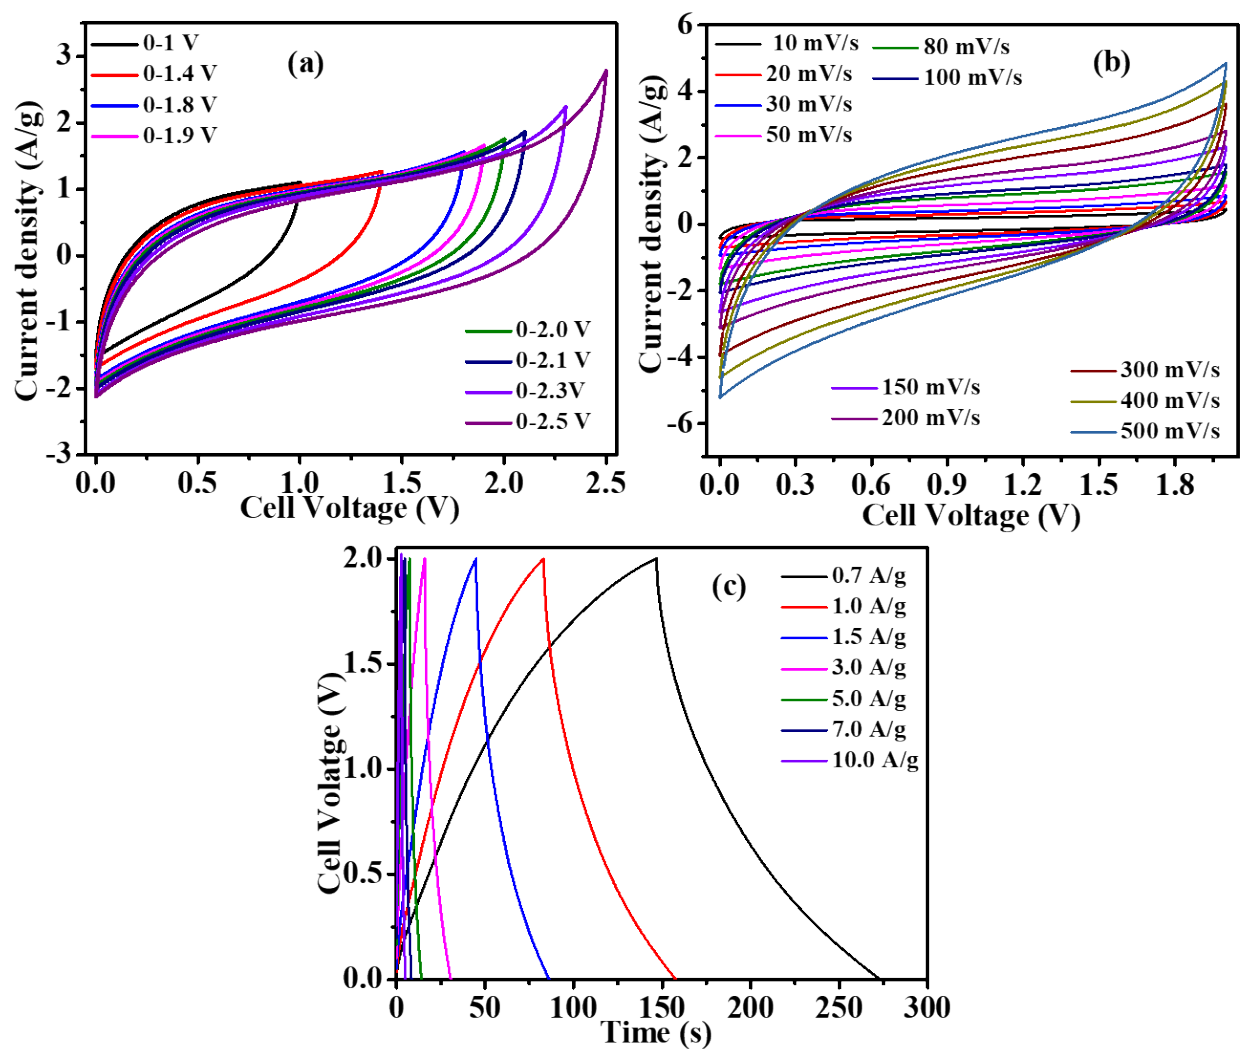

**Fig. S19.** CV measurements made for the SSC (using N, P-rGO as an electrode material) in the 0.1 m KClO<sub>4</sub> electrolyte: for a varied range of cell voltages (1-2.5 V) at a scan speed of 100 mV/s (a), at different scan rates from 10-500 mV/s (b); GCD for 2.0 V at different current density from 0.7 -10 A/g (c).

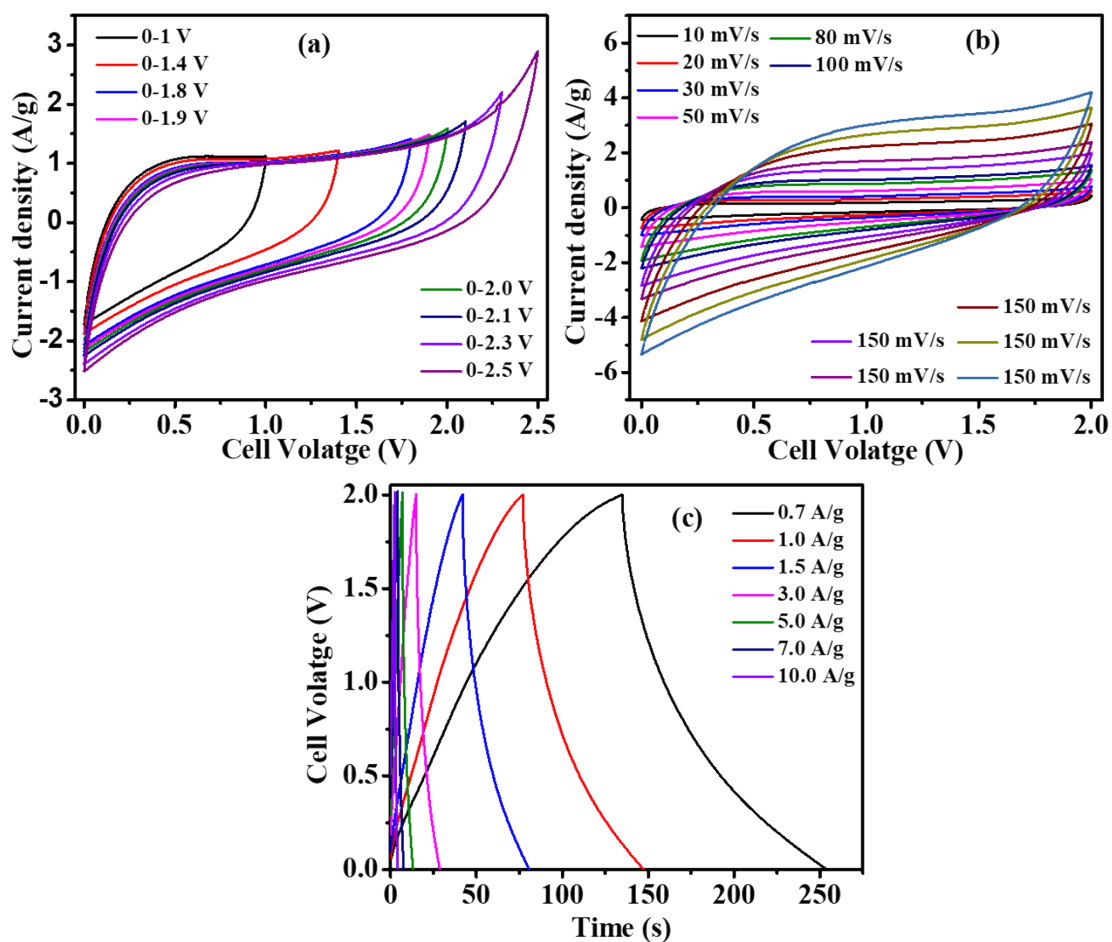

**Fig. S20.** CV measurements made for the SSC (using N, P-rGO as an electrode material) in the 0.1 m NaClO<sub>4</sub> electrolyte: for a varied range of cell voltages (1-2.5 V) at a scan speed of 100 mV/s (a), at different scan rates from 10-500 mV/s (b); GCD for 2.0 V at different current density from 0.7 -10 A/g (c).

**Table S3.** ATR-FTIR data obtained for DIW and electrolytes at their maximum solubility: CH<sub>3</sub>COONa (7 m), NaClO<sub>4</sub> (17 m), NaNO<sub>3</sub> (11 m), KNO<sub>3</sub> (3 m), K<sub>2</sub>SO<sub>4</sub> (0.5 m), and Na<sub>2</sub>SO<sub>4</sub> (2 m).

| Electrolytes                           | Ice-like component (cm <sup>-1</sup> ) | Ice-like liquid component (cm <sup>-1</sup> ) | Monomeric water (cm <sup>-1</sup> ) |
|----------------------------------------|----------------------------------------|-----------------------------------------------|-------------------------------------|
| DIW                                    | 3235                                   | 3380                                          | 3590                                |
| K <sub>2</sub> SO <sub>4</sub> (0.5 m) | 3238                                   | 3382                                          | 3591                                |
| Na <sub>2</sub> SO <sub>4</sub> (2 m)  | 3237                                   | 3378                                          | 3589                                |
| KNO <sub>3</sub> (3 m)                 | 3241                                   | 3384                                          | 3590                                |
| CH <sub>3</sub> COONa (7 m)            | 3327                                   | 3378                                          | 3591                                |
| NaNO <sub>3</sub> (11 m)               | 3249                                   | 3421                                          | 3590                                |
| NaClO <sub>4</sub> (17 m)              | 3246                                   | 3429                                          | 3587                                |

m).

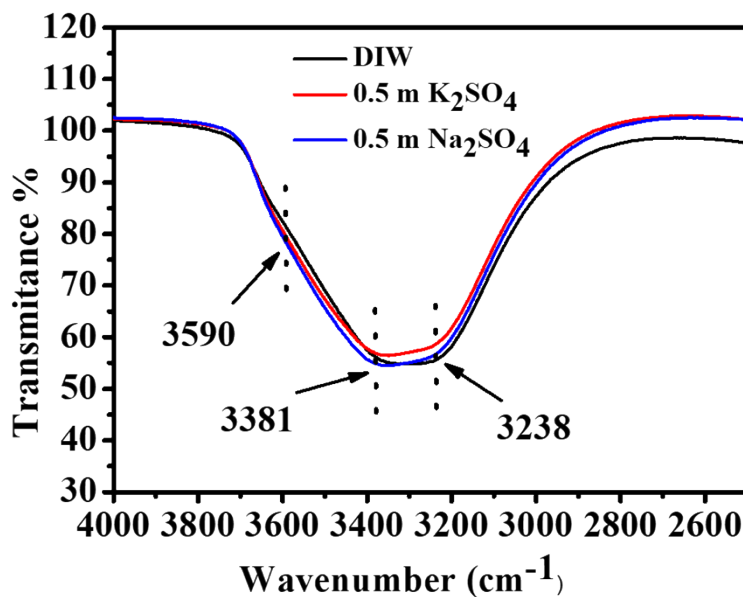

**Fig. S21.** Extended ATR-FTIR spectra of DIW, 0.5 m Na<sub>2</sub>SO<sub>4</sub> and 0.5 m K<sub>2</sub>SO<sub>4</sub>.



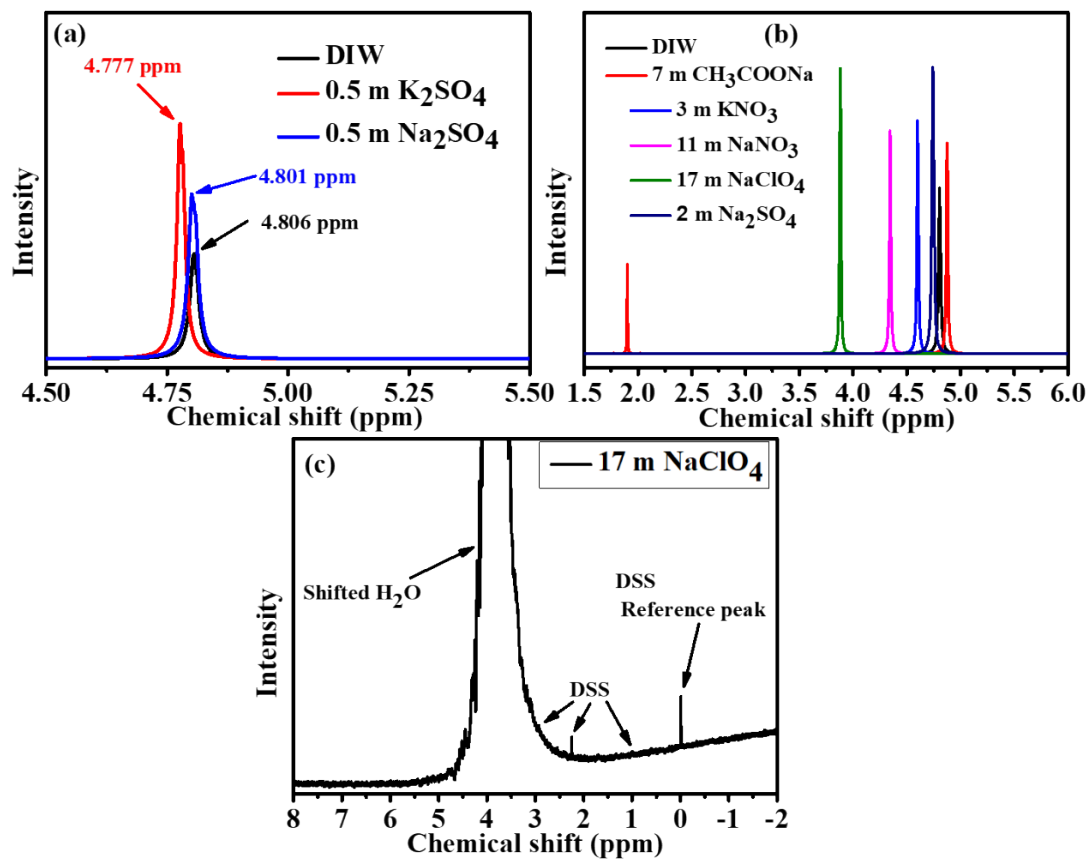

**Fig. S22.**  $^1\text{H}$  NMR spectra in extended chemical shift range for: DIW, 0.5 m  $\text{Na}_2\text{SO}_4$  and 0.5 m  $\text{K}_2\text{SO}_4$  (a); DIW, 7 m  $\text{CH}_3\text{COONa}$  (satd.), 3 m  $\text{KNO}_3$ , 11 m  $\text{NaNO}_3$ , 17 m  $\text{NaClO}_4$ , and 2 m  $\text{Na}_2\text{SO}_4$  (b); 17 m  $\text{NaClO}_4$  to show the DSS reference peaks.

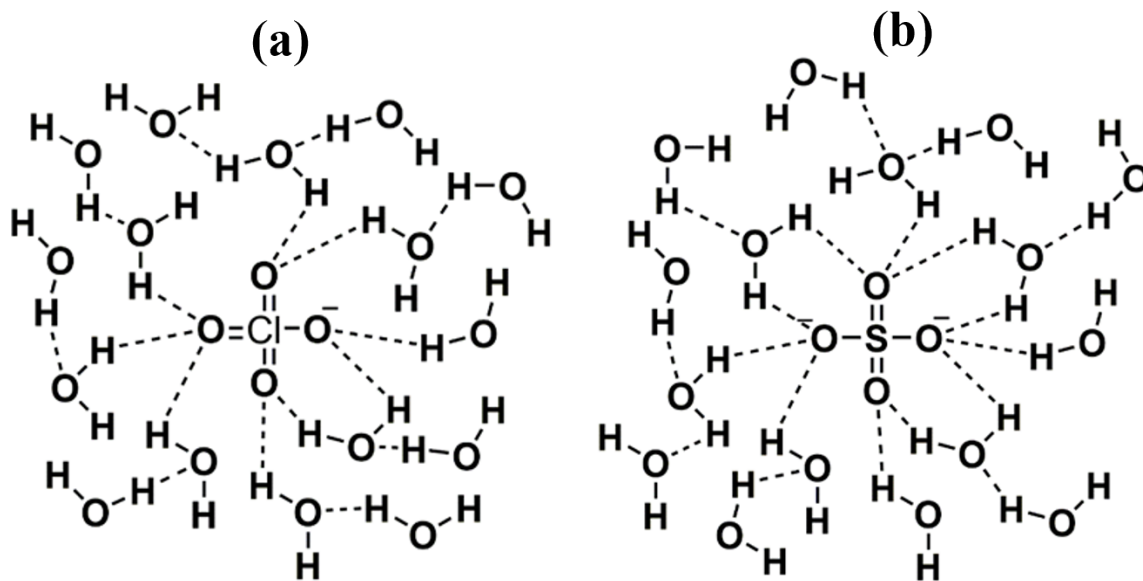

**Scheme S1.** The representation of  $\text{ClO}_4^-(\text{H}_2\text{O})_{16}$  cluster (a); and  $\text{SO}_4^{2-}(\text{H}_2\text{O})_{16}$  (b).

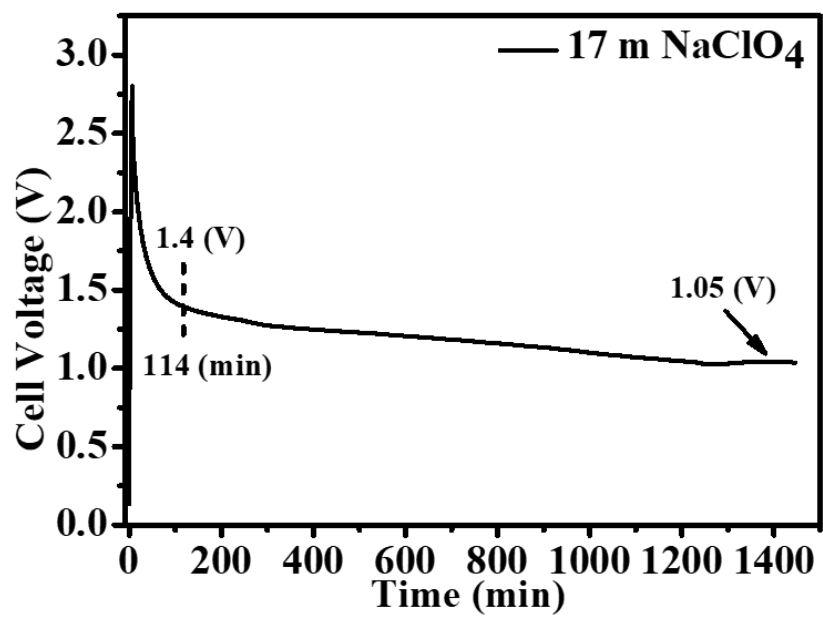

**Fig. S23.** Self-discharging of N, P-rGO in 17 m NaClO<sub>4</sub> electrolyte at a current density of 1 A/g.

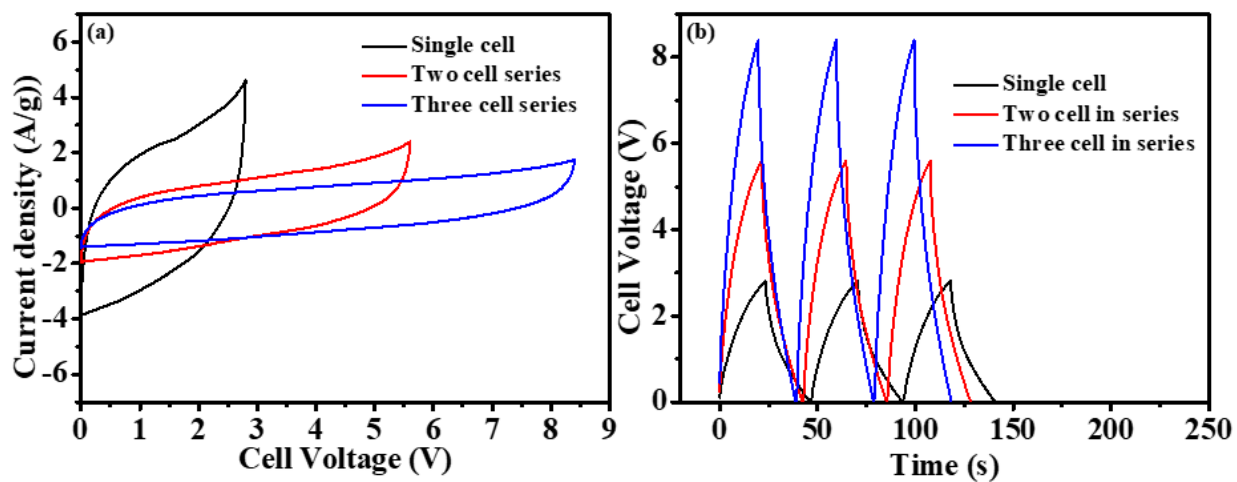

**Fig. S24.** Cyclic voltammograms recorded for N, P-rGO for single cell and by constructing tandem device by joining two and three SSC in series in 17 m NaClO<sub>4</sub> electrolyte at a scan rate of 100 mV/s (b); GCD curves recorded for the single cell and tandem device(s) in 17 m NaClO<sub>4</sub> at a current density of 5 A/g.

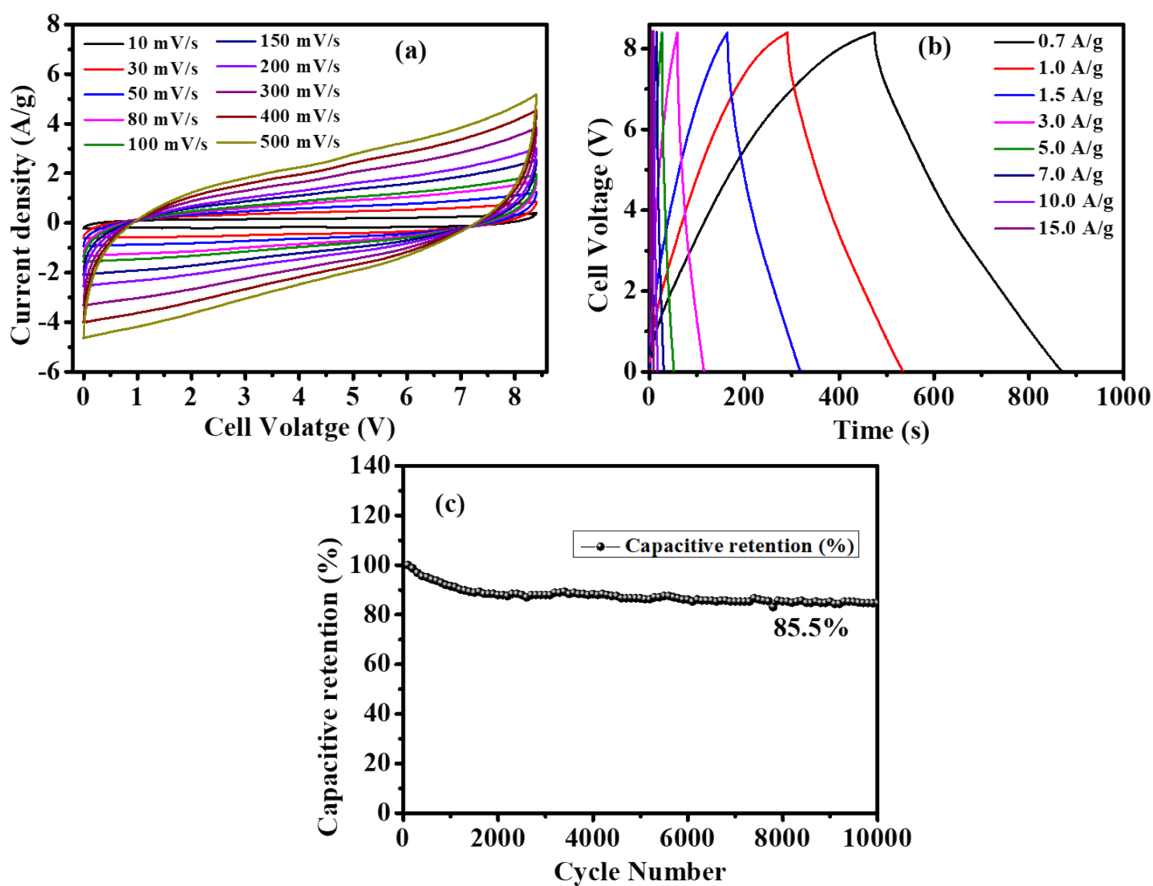

**Fig. S25.** CV curves of tandem device constructed by joining three SSC in series of N, P-rGO in 17 m NaClO<sub>4</sub> electrolyte recorded at scan rates varying from 10- 500 mV/s (a); GCD curves of tandem device in 17 m NaClO<sub>4</sub> at varied current densities of 0.7 - 15 A/g (b); Cyclic stability of a tandem device of the as-fabricated symmetric cell at 5 A/g (c).

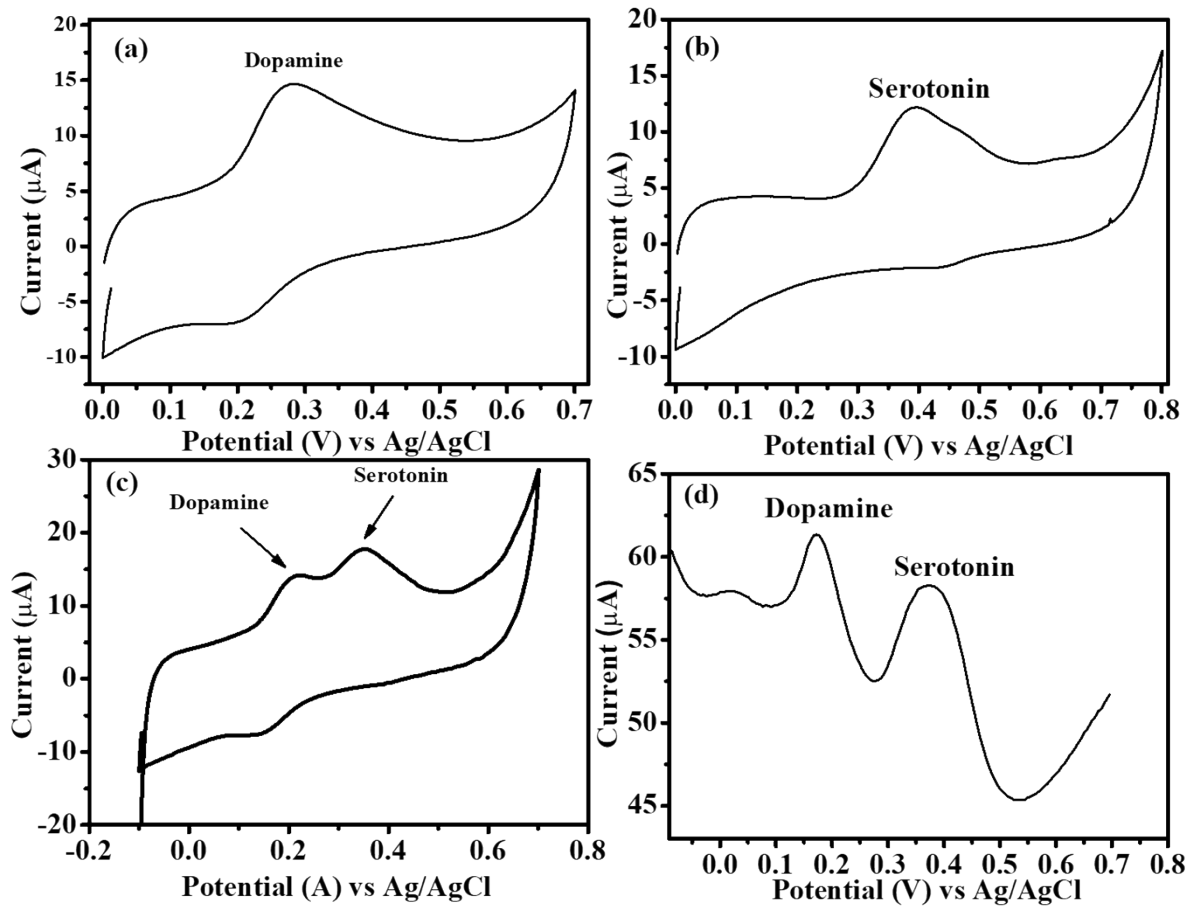

**Fig. S26.** CV curves of 50  $\mu\text{M}$  Dopamine (a), 50  $\mu\text{M}$  Serotonin (b) CV and DPV Simultaneous detection of Dopamine and serotonin respectively in 7.0 pH phosphate buffer (0.1 M).

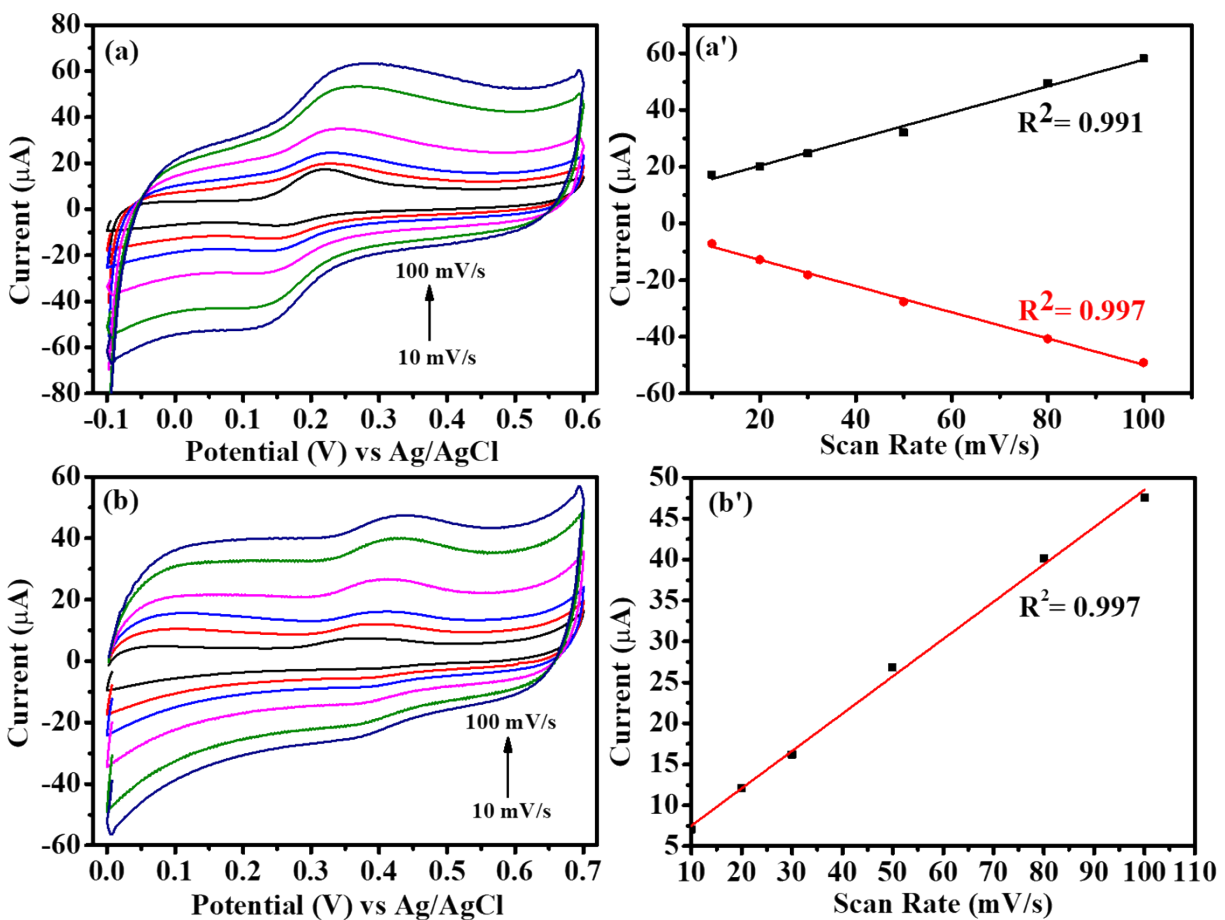

**Fig. S27.** CV curves of 50 μM Dopamine (a), 30 μM Serotonin (b) and corresponding current vs concentration plot (a') (b') respectively in 7.0 pH phosphate buffer (0.1 M).

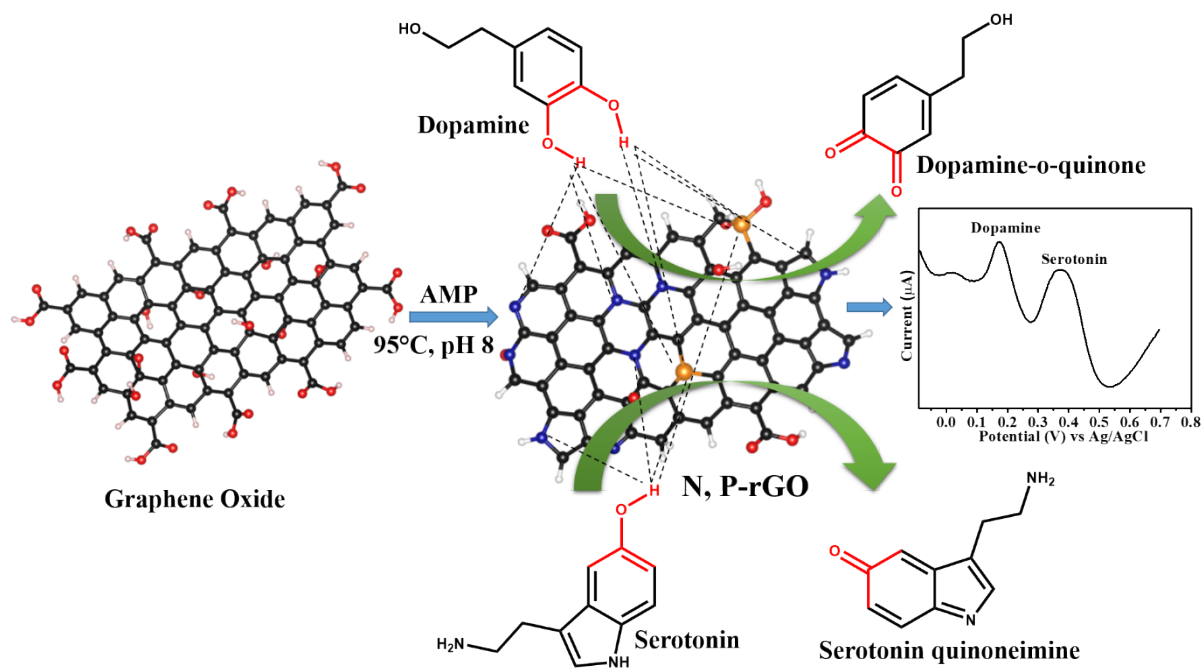

Black = Carbon, Red = Oxygen, Blue = Nitrogen, Yellow = Phosphorous and White = Hydrogen

**Scheme S2.** Schematic representation of simultaneous sensing of Dopamine and Serotonin at the interface of N-P-rGO electrode.



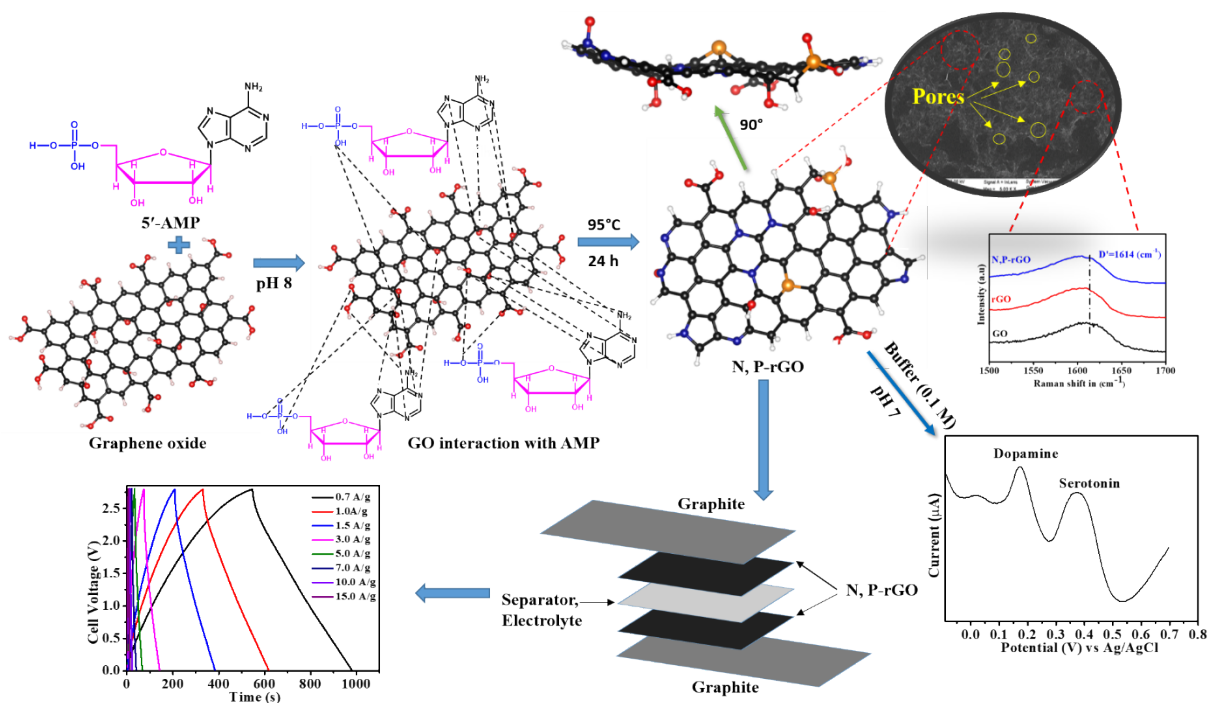

Black = Carbon, Red = Oxygen, Blue = Nitrogen, Yellow = Phosphorous and White = Hydrogen

**Scheme S3.** Schematic illustration representing the synthesis of 5'-AMP-mediated porous N, P-rGO nanohybrids and their use for investigating different electrochemical aspects.

**Table S4.** A comparison of the present work with the literature reports with respect to supercapacitor behavior.

| Materials                                               | Conducting agent/<br>Binder | Weight                              | Voltage Range (V) | Electrolyte                         | Energy Density (W h kg <sup>-1</sup> ) | Power Density (W kg <sup>-1</sup> ) | Cycle stability (current density)     | Ref.      |
|---------------------------------------------------------|-----------------------------|-------------------------------------|-------------------|-------------------------------------|----------------------------------------|-------------------------------------|---------------------------------------|-----------|
| N, P-co-doped porous carbon                             | acetylene black/<br>*PVDF   | 2 mg                                | 1                 | 6 M KOH                             | 26.289 (0.5 Ag <sup>-1</sup> )         | Maximum<br>3694.084                 | 10000, 94.2% (10 A g <sup>-1</sup> )  | 10        |
| N/P-co-doped Porous Carbon-Coated Graphene (KNPG)       | Super P/<br>*PTFE           | 1.5 mg/<br>electrode                | 1.4               | 6 KOH                               | 9.1                                    | 350                                 | 20000, 84.6% (5 A g <sup>-1</sup> )   | 11        |
| Nitrogen, Phosphorus-co-doped Carbon (NPC-800-2)        | carbon black/ PTEF          | 2 mg                                | 1.8               | 1 M Na <sub>2</sub> SO <sub>4</sub> | 21.5                                   | 250                                 | 100000, (2 A g <sup>-1</sup> )        | 12        |
| N, P-CQDs/rGO                                           | acetylene black/ PTFE       | Coin used                           | 1.3               | 6 M KOH                             | 15.69                                  | 325                                 | 10000, 85.5% (5 A g <sup>-1</sup> )   | 13        |
| N/P-G-3                                                 | carbon black/ PVDF          | 1.5x1 cm <sup>-1</sup><br>thin film | 1.6               | 1 M H <sub>2</sub> SO <sub>4</sub>  | 11.33                                  | 571                                 | 10000, 94% (5 A g <sup>-1</sup> )     | 14        |
| (NP-rGO)                                                | acetylene black /PVDF       | 3 mg                                | 1                 | 6 M KOH                             | 22.3                                   | 500                                 | 10000, 94.63%                         | 15        |
| N, P-co-doped hierarchical porous carbon                | -/ PTFE                     | coin-cells                          | 1                 | 1 M Na <sub>2</sub> SO <sub>4</sub> | 21                                     | 50                                  | 10000, 95%                            | 16        |
| Tremella-like nitrogen and Phosphorus-co-doped graphene | acetylene black/ PTFE       | 1.25 mg                             | 2                 | 2 M Li <sub>2</sub> SO <sub>4</sub> | 34.7                                   | 500                                 | 20000, 91.4% (5 A g <sup>-1</sup> )   | 17        |
| NPHCMs-65-800                                           | acetylene black/ PTFE       | 3 mg                                | 1                 | KOH/PVA gel                         | 6.4                                    | 0.1 k                               | 5000, 91% (0.5 A g <sup>-1</sup> )    | 18        |
| NP-PCNs-100                                             | -                           | 0.192 mg                            | 1.6               | 1 M Na <sub>2</sub> SO <sub>4</sub> | 17.04                                  | 400                                 | 10000, 90% (10 A g <sup>-1</sup> )    | 19        |
| 1NPHC-850//1NPHC-850                                    | Super P/<br>PTFE            | 2 mg cm <sup>-1</sup>               | 1.6               | 1 M Na <sub>2</sub> SO <sub>4</sub> | 10.61                                  | 400                                 | 10000, 86.3% (5 A g <sup>-1</sup> )   | 20        |
| N/P-co-doped graphene (NPG)                             | acetylene black (PTFE)      | 3 mg                                | 1.3               | 6 KOH                               | 8.17 (0.25Ag <sup>-1</sup> )           | 162                                 | 20000, 86.5% (10 A g <sup>-1</sup> )  | 21        |
| 5'-AMP-mediated-N, P co-doped rGO                       | -                           | 2.2 mg                              | 2.8               | 17 m NaClO <sub>4</sub>             | 59.2                                   | 489.6                               | 10000, 115.2% (10 A g <sup>-1</sup> ) | This work |
| 5'-AMP-mediated N, P co-doped rGO                       | -                           | 5.2 mg                              | 2.8               | 17 m NaClO <sub>4</sub>             | 26.4                                   | 819.7                               | 10000, 93.6% (1 A g <sup>-1</sup> )   | This work |

\*PVDF: -Polyvinylidene fluoride \*PTFE: -Polytetrafluoroethylene
